# Supplementary material for: Was low CO2 a driving force of C4 evolution: Arabidopsis responses to long-term low CO2 stress
Source: PubMed Central journal article supplement (PMC4085967; doi:10.1093/jxb/eru193), 2014-05-22

Was low [CO<sub>2</sub>] a driving force of C4 evolution? *Arabidopsis* responses to long-term low [CO<sub>2</sub>] stress. Yuanyuan Li, Jiajia Xu, Hui Zhang, and Xin-Guang Zhu

**Supplement Figure S1. Measure stomata density**

We examined eight fully expanded leaves from eight individual plants for each treatment. For each leaf, we took photos from 4 fields (same size; position as indicated in the following figure, red rectangle) of abaxial (lower) leaf blade epidermis. So for each treatment (normal [CO<sub>2</sub>] and low [CO<sub>2</sub>]), we measured 32 area (n=32).

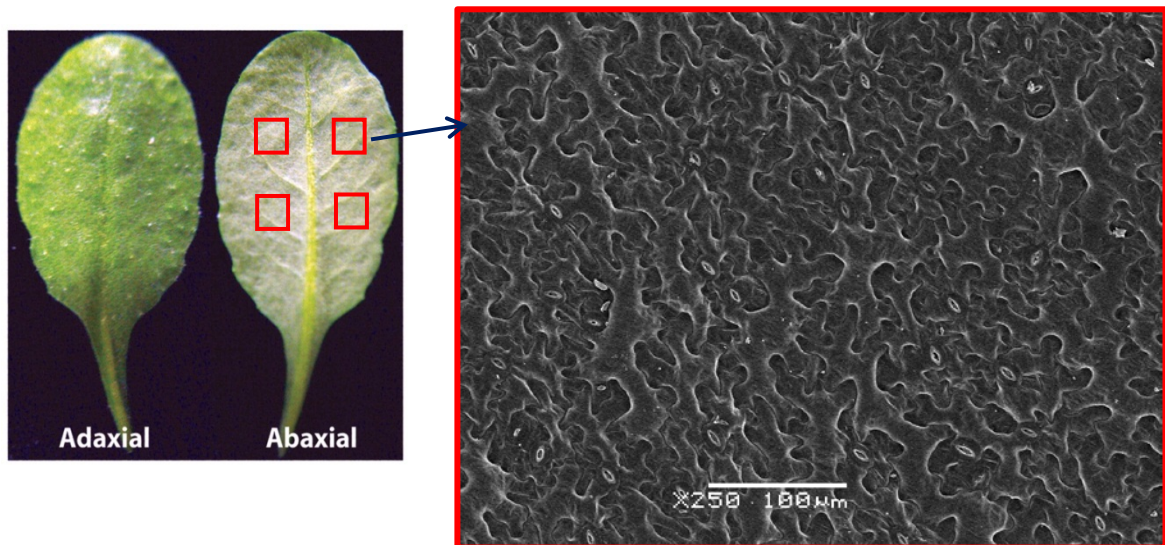

Supplement: supp_eru193_jexbot115923_file002.pdf [file supp_eru193_jexbot115923_file002.pdf]
